# Supplementary material for: Superior catalytic activity of α-Ni(OH)2 for urea electrolysis
Source: Royal Society of Chemistry journal article supplement (doi:10.1039/d1cy00435b), 2021-01-01
Supplement: d1cy00435b1.pdf [file d1cy00435b1.pdf]

## SUPPORTING INFORMATION

# Superior Catalytic Activity of $\alpha$ -Ni(OH)<sub>2</sub> for Urea Electrolysis

*Tzu-Ho Wu\**, *Bo-Wei Hou*

Department of Chemical and Materials Engineering, National Yunlin University of  
Science and Technology, 123 University Road, Section 3, Douliou, Yunlin 64002,  
Taiwan

\*Corresponding Author: Dr. Tzu-Ho Wu (ORCID: 0000-0002-5192-8912)

Tel.: +886-5-534-2601 Ext. 4628

E-mail: [wutzu@yuntech.edu.tw](mailto:wutzu@yuntech.edu.tw)

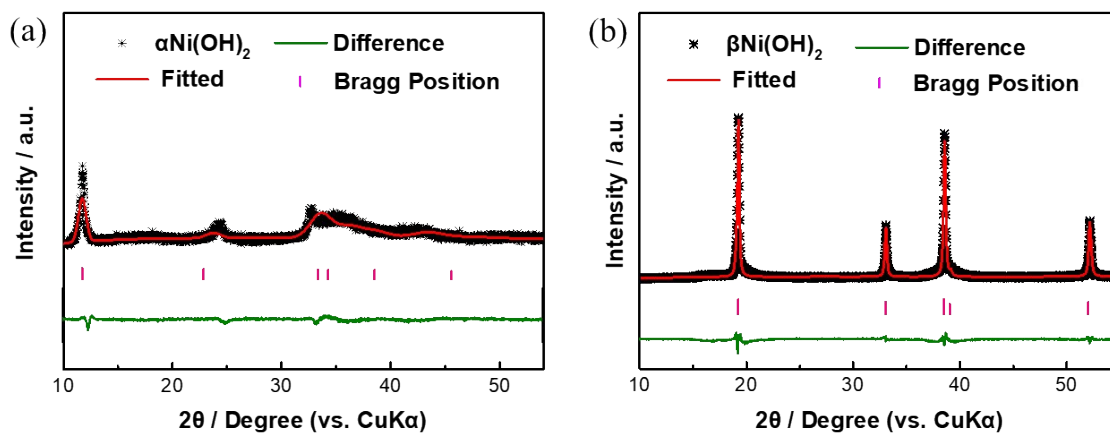

**Figure S1** XRD refinement of (a)  $\alpha\text{-Ni(OH)}_2$  and (b)  $\beta\text{-Ni(OH)}_2$ .

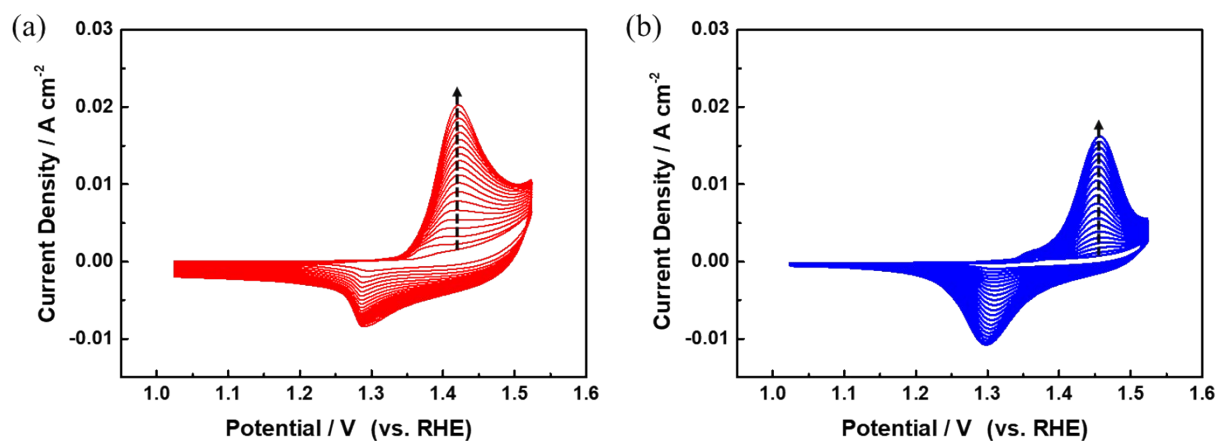

**Figure S2** The initial 20 CV curves of (a)  $\alpha\text{-Ni(OH)}_2$  and (b)  $\beta\text{-Ni(OH)}_2$  measured at the scan rate of  $5 \text{ mV s}^{-1}$  in the potential window of 1.02–1.52 V in 1 M KOH electrolyte.

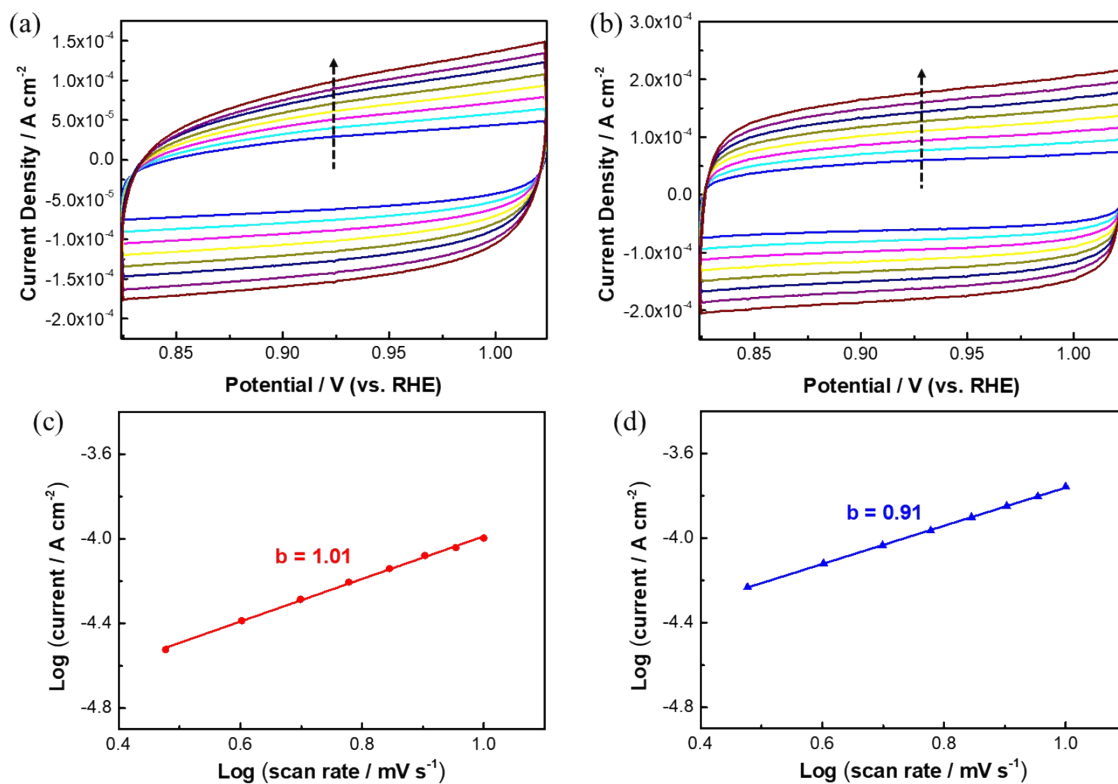

**Figure S3** CV curves of (a)  $\alpha$ -Ni(OH)<sub>2</sub> and (b)  $\beta$ -Ni(OH)<sub>2</sub> recorded at the scan rate of 30–100 mV s<sup>-1</sup> in the potential window between 0.82 and 1.02 V for the evaluation of double-layer capacitance; b-value determination at 0.92 V of (c)  $\alpha$ -Ni(OH)<sub>2</sub> and (d)  $\beta$ -Ni(OH)<sub>2</sub>.

**Table S1** Comparison of the UOR performance of catalysts reported in the literature.

| Catalysts                                               | Electrolyte                      | Onset potential (V vs RHE) at 10 mA/cm <sup>2</sup> | Current density (mA cm <sup>-2</sup> ) at 1.5 (V vs RHE) |
|---------------------------------------------------------|----------------------------------|-----------------------------------------------------|----------------------------------------------------------|
| <b><math>\alpha</math>-Ni(OH)<sub>2</sub> this work</b> | <b>1 M KOH +<br/>0.33 M urea</b> | <b>1.40</b>                                         | <b>58</b>                                                |
| Ni(OH) <sub>2</sub> nanomeshes <sup>1</sup>             | 1 M KOH +<br>0.33 M urea         | 1.35                                                | ~22                                                      |
| Ni(OH) <sub>2</sub> nanoflakes <sup>2</sup>             | 1 M KOH +<br>0.3 M urea          | ~1.42                                               | ~50                                                      |
| Ni(OH) <sub>2</sub> nanoparticles <sup>3</sup>          | 5 M KOH +<br>1 M urea            | 1.41                                                | ~82                                                      |
| Ni(OH) <sub>2</sub> nanotubes <sup>4</sup>              | 1 M KOH +<br>0.33 M urea         | ~1.41                                               | ~71                                                      |
| Ni(OH) <sub>2</sub> nanocups <sup>5</sup>               | 1 M KOH +<br>0.33 M urea         | ~1.47                                               | ~16                                                      |
| S-Ni(OH) <sub>2</sub> <sup>6</sup>                      | 1 M KOH +<br>0.33 M urea         | 1.32                                                | ~35                                                      |
| NiCr/C <sup>7</sup>                                     | 1 M KOH +<br>0.33 M urea         | 1.34                                                | ~62                                                      |
| LaNiO <sub>3</sub> <sup>8</sup>                         | 1 M KOH +<br>0.33 M urea         | ~1.41                                               | ~23                                                      |
| NiCo <sub>2</sub> O <sub>4</sub> <sup>9</sup>           | 1M KOH +<br>0.33 M urea          | 1.43                                                | ~22                                                      |
| NiMoO <sub>4</sub> <sup>10</sup>                        | 1 M KOH +<br>0.50 M urea         | ~1.37                                               | ~125                                                     |

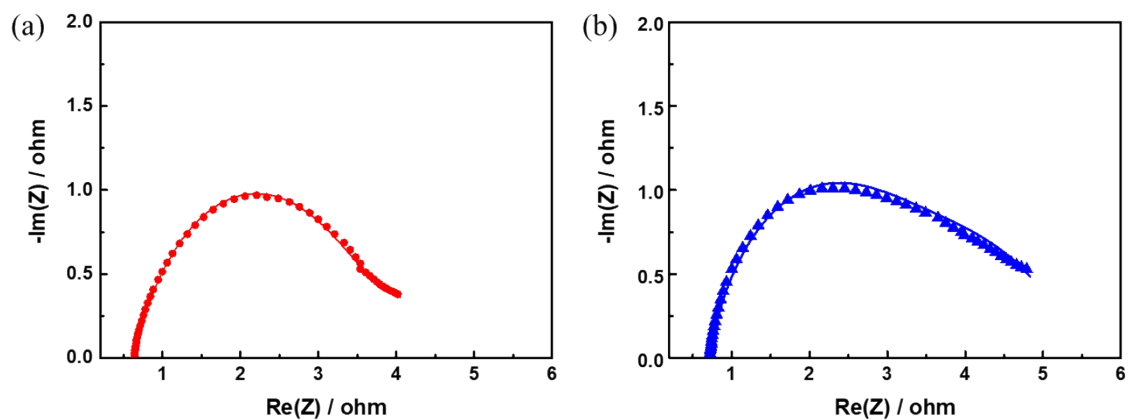

**Figure S4** EIS fitting curves of (a)  $\alpha$ -Ni(OH)<sub>2</sub> and (b)  $\beta$ -Ni(OH)<sub>2</sub> from Figure 5a.

**Table S2** EIS fitting results of (a)  $\alpha$ -Ni(OH)<sub>2</sub> and (b)  $\beta$ -Ni(OH)<sub>2</sub> from Figure 5a.

|                               | $R_s$ ( $\Omega$ ) | $R_1$ ( $\Omega$ ) | $R_2$ ( $\Omega$ ) |
|-------------------------------|--------------------|--------------------|--------------------|
| $\alpha$ -Ni(OH) <sub>2</sub> | 0.63               | 2.91               | 1.57               |
| $\beta$ -Ni(OH) <sub>2</sub>  | 0.71               | 2.58               | 2.18               |

(a)  $\alpha\text{-Ni(OH)}_2$

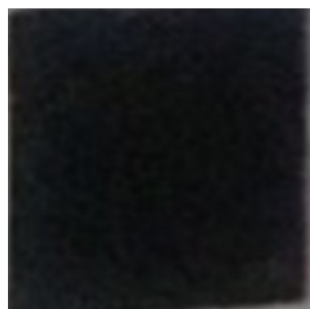

Pristine

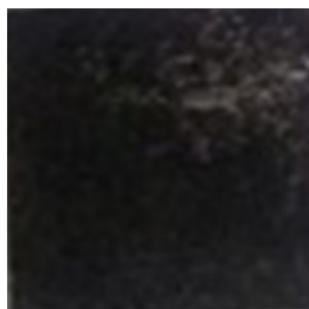

After 20,000 s

(b)  $\beta\text{-Ni(OH)}_2$

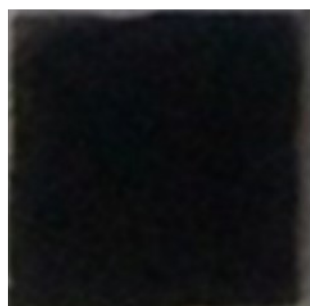

Pristine

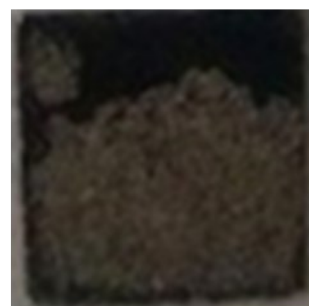

After 20,000 s

**Figure S5** The photograph of the (a)  $\alpha\text{-Ni(OH)}_2$  and (b)  $\beta\text{-Ni(OH)}_2$  electrode before and after stability tests.

## Notes and references

1. Y. Ding, Y. Li, Y. Xue, B. Miao, S. Li, Y. Jiang, X. Liu and Y. Chen, *Nanoscale*, 2019, **11**, 1058.
2. W. Yang, X. Yang, C. Hou, B. Li, H. Gao, J. Lin and X. Luo, *Appl. Catal. B*, 2019, **259**, 118020.
3. V. Vedharathinam and G. G. Botte, *Electrochim. Acta*, 2013, **108**, 660.
4. R.-Y. Ji, D.-S. Chan, J.-J. Jow and M.-S. Wu, *Electrochem. Commun.*, 2013, **29**, 21.
5. M.-S. Wu, R.-Y. Ji and Y.-R. Zheng, *Electrochim. Acta*, 2014, **144**, 194.
6. X. Zhu, X. Dou, J. Dai, X. An, Y. Guo, L. Zhang, S. Tao, J. Zhao, W. Chu, X. C. Zeng, C. Wu and Y. Xie, *Angew. Chem. Int. Ed.*, 2016, **55**, 12465.
7. R. K. Singh and A. Schechter, *ChemCatChem*, 2017, **9**, 3374.
8. R. P. Forslund, J. T. Mefford, W. G. Hardin, C. T. Alexander, K. P. Johnston and K. J. Stevenson, *ACS Catal.*, 2016, **6**, 5044.
9. R. Ding, L. Qi, M. Jia and H. Wang, *Nanoscale*, 2014, **6**, 1369.
10. Y. Tong, P. Chen, M. Zhang, T. Zhou, L. Zhang, W. Chu, C. Wu and Y. Xie, *ACS Catalysis*, 2017, **8**, 1.
